# Supplementary material for: Assessing the Cumulative Impacts of Forest Management on Forest Age Structure Development and Woodland Caribou Habitat in Boreal Landscapes: A Case Study from Two Canadian Provinces
Source: MDPI journal article supplement (doi:10.3390/land13010006), 2023-12-19
Supplement: s1 [file s1]

## Supplementary Materials

Assessing the cumulative impacts of forest management on forest age structure development and woodland caribou in boreal landscapes: a case study from two Canadian provinces

Authors: Brendan Mackey<sup>1</sup>, Carly Campbell<sup>1</sup>, Patrick Norman<sup>1</sup>, Sonia Hugh<sup>1</sup>, Dominick A. DellaSala<sup>2</sup>, Jay R. Malcolm<sup>3</sup>, Mélanie Desrochers<sup>4</sup> and Pierre Drapeau<sup>4</sup>

Table S1: Availability of Ontario FRI data for all FMUs in the study region.

| FMU_CODE | FMU_NAME                 | Public | Year | # Polygons | Notes                                                                                                                 |
|----------|--------------------------|--------|------|------------|-----------------------------------------------------------------------------------------------------------------------|
| 966      | Pic Forest               | Y      | 2008 | 107052     | MarathomBlock in V2                                                                                                   |
| 421      | Pineland Forest          | Y      | 2011 | 35471      |                                                                                                                       |
| 177      | Dog River-Matawin Forest | Y      | 2012 | 84051      |                                                                                                                       |
| 350      | Kenogami Forest          | N      |      |            |                                                                                                                       |
| 535      | Dryden Forest            | Y      | 2015 | 25733      | Productive Forest Area retrieved from (Arbex Forest Resource Consultants Ltd. 2016)                                   |
| 438      | Gordon Cosens Forest     | Y      | 2012 | 150813     |                                                                                                                       |
| 120      | Trout Lake Forest        | Y      | 2013 | 9,697      |                                                                                                                       |
| 35       | Black Spruce Forest      | Y      | 2015 | 94557      |                                                                                                                       |
| 816      | Lake Nipigon Forest      | Y      | 2014 | 145330     |                                                                                                                       |
|          | Romeo                    |        | 2005 | 59,294     | Not currently publicly available. Productive Forest Area retrieved from (Arbex Forest Resource Consultants Ltd. 2019) |
| 930      | Malette Forest           | N      |      |            |                                                                                                                       |
| 574      | Missinaibi Forest        | Y      | 2014 | 130240     | Combination of Martel and MagpieForest in V2                                                                          |
| 280      | Timiskaming Forest       | Y      | 2014 | 131947     |                                                                                                                       |
| 994      | Whitefeather Forest      | N      |      |            | Productive Forest Area retrieved from (ArborVitae Environmental Services Ltd. 2018)                                   |
| 390      | Nagagami Forest          | Y      | 2014 | 34623      |                                                                                                                       |
| 615      | Algoma Forest            | Y      | 2013 | 139959     |                                                                                                                       |
| 840      | Red Lake Forest          | Y      | 2010 | 24005      |                                                                                                                       |
| 702      | Lac Seul Forest          | Y      | 2015 | 82789      |                                                                                                                       |
| 406      | Boundary Waters Forest   | Y      | 2010 | 189513     | Combination of Crossroute and Sapawe in V2                                                                            |
| 415      | Ogoki Forest             | Y      | 2010 | 113330     |                                                                                                                       |
| 60       | White River Forest       | Y      | 2010 | 65820      |                                                                                                                       |
| 175      | Caribou Forest           | Y      | 2012 | 52335      |                                                                                                                       |

|     |                              |   |      |        |                                       |
|-----|------------------------------|---|------|--------|---------------------------------------|
| 796 | Lakehead Forest              | Y | 2009 | 71040  |                                       |
| 230 | English River Forest         | Y | 2013 | 90111  |                                       |
| 490 | Whiskey Jack Forest          | Y | 2008 | 71079  |                                       |
| 644 | Kenora Forest                | Y | 2015 | 93772  |                                       |
| 130 | Wabigoon Forest              | Y | 2010 | 68703  |                                       |
| 210 | Spanish Forest               | Y | 2013 | 101544 |                                       |
| 601 | Hearst Forest                | Y | 2007 | 131932 |                                       |
| 110 | Abitibi River Forest         | Y | 2011 | 244279 |                                       |
| 680 | Northshore Forest            | Y | 2013 | 106305 |                                       |
| 443 | Wabadowgan g Noopming Forest | Y | 2014 |        | Part of the Lake Nipigon Forest in V2 |

Table S2: Quebec southern ecoforest inventory data codes for the ORIGINE attribute, with designations assigned for this study.

| Code | Description                                                    | Assigned As |
|------|----------------------------------------------------------------|-------------|
| BR   | Brûlis total                                                   | Fire        |
| BRD  | Brûlage dirigé                                                 | Fire        |
| CBA  | Coupe par bandes                                               | Harvest     |
| CBT  | Coupe par bandes finale                                        | Harvest     |
| CDV  | Coupe avec protection des tiges à diamètre variable            | Harvest     |
| CEF  | Coupe d'ensemencement finale                                   | Harvest     |
| CHT  | Chablis total                                                  | Wind        |
| CIF  | Coupe progressive irrégulière phase finale                     | Harvest     |
| CPE  | Coupe progressive d'ensemencement (coupe finale)               | Harvest     |
| CPH  | Coupe avec protection de la haute régénération et des sols     | Harvest     |
| CPR  | Coupe avec protection de la régénération                       | Harvest     |
| CPT  | Coupe avec protection des petites tiges marchandes et des sols | Harvest     |
| CRB  | Coupe de récupération dans un brûlis                           | Harvest     |
| CRR  | Récolte des tiges résiduelles et des rebuts                    | Harvest     |
| CRS  | Coupe avec réserve de semencier                                | Harvest     |
| CS   | Coupe de succession                                            | Harvest     |
| CT   | Coupe totale                                                   | Harvest     |
| DT   | Dépérissment total                                             | Dieback     |
| ENM  | Ensemencement avec mini-serres                                 | Plantation  |
| ENS  | Ensemencement                                                  | Plantation  |
| ES   | Épidémie grave                                                 | Disease     |
| ETR  | Élimination des tiges résiduelles                              | Harvest     |
| FR   | Friche                                                         | Development |
| P    | Plantation                                                     | Plantation  |
| PLB  | Plantation de boutures                                         | Plantation  |

|            |                                                                                  |                 |
|------------|----------------------------------------------------------------------------------|-----------------|
| PLN        | Plantation à racines nues                                                        | Plantation      |
| PLR        | Plantation avec semis en récipients                                              | Plantation      |
| PRR        | Regarni de régénération pour constituer l'équivalent d'une plantation            | Plantation      |
| REA        | Régénération d'aire d'ébranchage                                                 | Harvest         |
| RIA        | Régénération de site d'infrastructure abandonnée                                 | Developmen<br>t |
| RPS        | Récupération en vertu d'un plan spécial d'aménagement                            | Harvest         |
| VER        | Verglas grave                                                                    | Ice             |
| BRU        | Brûlage dirigé                                                                   | Fire            |
| CIF        | Coupes progressives irrégulières phase finale                                    | Harvest         |
| CPHRS      | Coupe avec protection de la haute régénération et des sols                       | Harvest         |
| CPI_RL_F   | Coupe progressive irrégulière à régénération lente phase finale                  | Harvest         |
| CPPTM_DISS | Coupe avec protection des petites tiges marchandes discontinue                   | Harvest         |
| CPPTM_U    | Coupe avec protection des petites tiges marchandes uniforme                      | Harvest         |
| CPRS_BA    | Coupe avec protection de la régénération et des sols par bandes                  | Harvest         |
| CPRS_DA    | Coupe avec protection de la régénération et des sols en damier                   | Harvest         |
| CPRS_PA    | Coupe avec protection de la régénération et des sols en parquets                 | Harvest         |
| CPRS_T     | Coupe avec protection de la régénération et des sols par trouées                 | Harvest         |
| CPRS_U     | Coupe avec protection de la régénération et des sols uniforme                    | Harvest         |
| CPR_U-F    | Coupe progressive régulière uniforme finale                                      | Harvest         |
| CTSP_BA    | Coupe totale sans protection par bandes                                          | Harvest         |
| CTSP_DA    | Coupe totale sans protection en damier                                           | Harvest         |
| CTSP_PA    | Coupe totale sans protection en parquets                                         | Harvest         |
| CTSP_T     | Coupe totale sans protection par trouées                                         | Harvest         |
| CTSP_U     | Coupe totale sans protection uniforme                                            | Harvest         |
| CTX        | Ancienne coupe totale sans référence cartographique, dont l'année de réalisation | Harvest         |
| PL         | Plantation                                                                       | Plantation      |
| RECUP_C-T  | Coupe de récupération totale après chablis                                       | Harvest         |
| RECUP_F-T  | Coupe de récupération totale après feu                                           | Harvest         |
| RECUP_I-T  | Coupe de récupération totale après épidémie d'insectes                           | Harvest         |
| RECUP_M-T  | Coupe de récupération totale après maladie                                       | Harvest         |

---
